# Supplementary material for: Road ecology of a Chihuahuan Desert snake community: size-based mortality sets the stage for evolutionary change in a widespread pitviper
Source: PeerJ. 2025 Aug 12;13:e19871. doi: 10.7717/peerj.19871 (PMC12356186; doi:10.7717/peerj.19871)
Supplement: Supplemental Information 1 — Includes all data from standardized and opportunistic surveys. See Methods for details about data collection. [file peerj-13-19871-s001.xlsx]

## Sheet: Sheet1
species	date	latitude	longitude	dor	sex	svl_cm	tl_cm	weight_g	deathblow
Crotalus viridis	2014-04-11	32.1548	-106.488	N	M	61	5.8
Rhinocheilus lecontei	2014-04-16	32.2604	-106.388	N	M	51.2	8.6
Masticophis flagellum	2014-04-25			Y	M
Rhinocheilus lecontei	2014-04-25			Y	M	62.4	9.3
Crotalus viridis	2014-05-04	32.1765	-106.449	Y	F	80	5.6
Pituophis catenifer	2014-05-04	32.1519	-106.492	Y	M	98.4	14.9
Arizona elegans	2014-07-20	32.2541	-106.398	N	M	54.2	9.6
Crotalus atrox	2014-07-20	32.1444	-106.5	Y	M	78.6	7.8
Crotalus atrox	2014-07-20	32.2638	-106.399	N	M	69.4	6.1
Rhinocheilus lecontei	2014-07-20	32.1588	-106.483	Y	M	62.1	10.5
Crotalus atrox	2014-07-27	32.1859	-106.433	Y	M	120	11.7
Crotalus atrox	2014-08-03			Y	M	70.4	7.3
Masticophis flagellum	2014-08-03	32.1281	-106.496	Y	M	111	34.5
Crotalus atrox	2014-08-11	32.1775	-106.447	N	M	91.2	7.8
Arizona elegans	2015-09-12	32.2019	-106.409	N	M	38.9	6.8	22
Crotalus atrox	2015-09-12	32.1872	-106.431	N	M	46.7	4.9	64
Crotalus atrox	2015-09-12	32.2623	-106.399	N	M	63.5	6	193
Crotalus atrox	2015-09-12	32.0764	-106.482	N	M	81.5	6.4	456
Crotalus viridis	2015-09-12	32.2985	-106.402	N	M	93.5	8.2	556
Crotalus viridis	2015-09-12	32.2743	-106.4	N	J	31	2.3	8
Pituophis catenifer	2015-09-12	32.1723	-106.459	Y	F	50.5	7.1	40	Head
Pituophis catenifer	2015-09-12	32.2795	-106.401	N	M	44.4	7.6	30
Rhinocheilus lecontei	2015-09-12	32.2552	-106.398	Y	M	66.2	11	102	Body
Crotalus atrox	2015-09-13	32.2171	-106.401	N	M	46.6	4.7	83
Crotalus atrox	2015-09-13	32.1118	-106.491	N	M	84.9	8	278	Tail
Crotalus viridis	2015-09-13	32.186	-106.432	N	M	89.4	7.7	219	Tail
Pituophis catenifer	2015-09-13	32.1911	-106.425	N	M	41.4	6.2	22
Arizona elegans	2015-09-23	32.2764	-106.401	N	M	21.7	3.6	3
Crotalus atrox	2015-09-23	32.2726	-106.4	N	M	74.9	6.7	266
Crotalus atrox	2015-09-23	32.2316	-106.398	N	M	48.4	4.2	75
Crotalus atrox	2015-09-23	32.2293	-106.399	Y
Crotalus atrox	2015-09-23	32.2565	-106.398	N	M	72	6.6	241
Crotalus atrox	2015-09-23	32.2863	-106.4	N	M	123	10.9	1465
Crotalus atrox	2015-09-23	32.3241	-106.41	Y	M
Crotalus atrox	2015-09-23	32.1763	-106.45	N	M	50.6	4.7	86
Crotalus viridis	2015-09-23	32.3241	-106.41	N	F	71.5	5.2	224
Crotalus viridis	2015-09-23	32.1036	-106.489	Y	F	67	4.2		Head
Lampropeltis splendida	2015-09-23	32.1865	-106.432	N	J	33.5	7.8	10
Masticophis flagellum	2015-09-23	32.1281	-106.496	Y
Pituophis catenifer	2015-09-23	32.0766	-106.482	N	F	106.5	12.8	393
Rhinocheilus lecontei	2015-09-23	32.256	-106.398	Y	J	23.6	4.3	7
Arizona elegans	2015-09-24	32.2167	-106.401	N	F	66.5	11.8	147
Arizona elegans	2015-09-24	32.274	-106.4	Y	M	22.1	4.2	4	Head
Arizona elegans	2015-09-24	32.2729	-106.4	N	J	21.3	3.1	3
Crotalus atrox	2015-09-24	32.169	-106.466	N	M	75	6.8	255
Crotalus atrox	2015-09-24	32.186	-106.432	Y	M	80.6	7.5		Head
Crotalus atrox	2015-09-24	32.1988	-106.413	N	F	84.2	6.1	385
Crotalus atrox	2015-09-24	32.1988	-106.413	N	M	96.5	8.4	401
Crotalus atrox	2015-09-24	32.2227	-106.4	N	F	50.5	3.5	105
Crotalus atrox	2015-09-24	32.2615	-106.399	N	J
Crotalus atrox	2015-09-24	32.2779	-106.401	N
Crotalus atrox	2015-09-24	32.2802	-106.401	N	J
Crotalus viridis	2015-09-24	32.1074	-106.49	N	M	64.9	5.8	172
Crotalus viridis	2015-09-24	32.1085	-106.49	N	M	66.6	6	198
Crotalus viridis	2015-09-24	32.2252	-106.4	N	M	65.9	7	238
Crotalus viridis	2015-09-24	32.2983	-106.402	N	M
Crotalus viridis	2015-09-24	32.3007	-106.403	N	J
Crotalus viridis	2015-09-24	32.2622	-106.399	N	J
Crotalus viridis	2015-09-24	32.2275	-106.399	N	J
Crotalus viridis	2015-09-24	32.1926	-106.423	N
Lampropeltis splendida	2015-09-24	32.1796	-106.442	Y	F	82	12.8
Arizona elegans	2015-10-10	32.2139	-106.402	N	J	33.2	5.2	18
Crotalus atrox	2015-10-10	32.1481	-106.5	N	F	86.5	5.2	505
Crotalus atrox	2015-10-10	32.1574	-106.484	N	M	86.8	7.1	333
Crotalus atrox	2015-10-10	32.1854	-106.433	Y	M	78.2	7	344	Mid-body
Crotalus atrox	2015-10-10	32.2928	-106.4	Y	F	79	5.1	364	Mid-body
Crotalus atrox	2015-10-10	32.267	-106.399	N	M	51.7	4.6	105
Crotalus atrox	2015-10-10	32.2528	-106.398	Y	M
Crotalus atrox	2015-10-10	32.1745	-106.455	N	M	85.1	7.8	396
Crotalus atrox	2015-10-10	32.1481	-106.5	Y	M				Tail
Crotalus atrox	2015-10-10	32.0883	-106.485	Y	M	86.5	8.1		Mid-body
Crotalus viridis	2015-10-10	32.297	-106.401	Y	J	30.3	2.3	19	Head
Lampropeltis splendida	2015-10-10	32.1413	-106.499	N	J	31.6	4.8	12
Crotalus atrox	2015-10-26	32.2207	-106.401	N	F	72	4.9	271
Crotalus atrox	2015-10-26	32.1135	-106.492	Y	M	78.4	6.5		Mid-body
Arizona elegans	2016-06-03	32.1031	-106.489	N	F	55.2	10.3
Crotalus viridis	2016-06-03	32.2668	-106.399	N	M	69.2	6.5
Hypsiglena jani	2016-06-03	32.2081	-106.403	N	M	25.6	4.9
Hypsiglena jani	2016-06-03	32.193	-106.422	N	M	24.9	4.7
Hypsiglena jani	2016-06-03	32.1877	-106.43	N	M	27.6	5.2
Crotalus atrox	2016-06-05	32.1857	-106.433	N	M	115.4	10.6
Crotalus atrox	2016-06-05	32.2077	-106.403	Y	M	59.6	4.9
Crotalus atrox	2016-06-05	32.2747	-106.4	N	M	63	6.2
Crotalus atrox	2016-06-05	32.1217	-106.494	N	J
Hypsiglena jani	2016-06-05	32.0609	-106.477	Y	F	42.5	5.8
Pituophis catenifer	2016-06-05	32.2652	-106.399	N	M	81.9	13.5
Pituophis catenifer	2016-06-05	32.0445	-106.469	Y	M
Crotalus atrox	2016-09-11	32.2789	-106.401	N	J	35.1	3.2
Crotalus atrox	2016-09-11	32.3049	-106.404	N	J	31.2	2.5
Crotalus atrox	2016-09-11	32.1852	-106.433	N	J	31.8	2.4
Pituophis catenifer	2017-04-14	32.095	-106.487	N	F	45.5	6.6	30
Arizona elegans	2017-04-21	32.1868	-106.431	N	F	69.6	13.8	124
Crotalus atrox	2017-04-21	32.2682	-106.399	N	F	44.9	3	54
Crotalus viridis	2017-04-21	32.131	-106.496	N	M	37	2.7	25
Rhinocheilus lecontei	2017-04-21	32.1323	-106.497	Y	M	49.5	9	36	Head
Arizona elegans	2017-04-25	32.204	-106.406	N	M	32.7	6.2	16
Crotalus atrox	2017-04-25	32.2376	-106.397	N	M	65.2	5.4	134
Crotalus atrox	2017-04-25	32.2376	-106.397	N	F	43.5	3.8	38
Crotalus atrox	2017-04-25			N	J
Crotalus atrox	2017-04-25			N	J
Rhinocheilus lecontei	2017-04-25	32.2142	-106.402	N	M	40.9	6.9	23
Rhinocheilus lecontei	2017-05-14	32.0699	-106.48	Y	M	43.5	7.7		Head
Arizona elegans	2017-05-27	32.1219	-106.494	Y	M	30.6	6.6		Mid-body
Arizona elegans	2017-05-29	32.1257	-106.495	N	F	55.2	10.9	69
Arizona elegans	2017-05-29	32.1851	-106.434	N	F	67.7	12.2	110
Arizona elegans	2017-05-29	32.2379	-106.397	N	J	29.6	5.1	8
Arizona elegans	2017-05-29	32.262	-106.399	N	J	32.8	5.8	11
Crotalus atrox	2017-05-29	32.2759	-106.4	Y	M	95.4	7.8	455	Head
Rhinocheilus lecontei	2017-05-29	32.1666	-106.47	N	F	71.3	10.8	110
Arizona elegans	2017-06-04			Y
Crotalus atrox	2017-06-04	32.1878	-106.43	N	M	80.9	6.8	295
Crotalus atrox	2017-06-04			N	F	62.7	4.1	167
Hypsiglena jani	2017-06-04	32.3136	-106.407	N	M	37.5	6.3	19
Tantilla nigriceps	2017-06-04	32.0909	-106.486	N	F	19.6	4	2
Arizona elegans	2017-06-18	32.2388	-106.397	N	M	33.3	5.9	15
Crotalus atrox	2017-06-18	32.2553	-106.398	N	M	118	10	1003
Crotalus atrox	2017-06-18			N	J
Crotalus atrox	2017-06-18	32.1625	-106.478	Y	F	75.1	4.7	217	Head
Rhinocheilus lecontei	2017-06-18	32.1645	-106.475	Y	M	24.1	3.9	5	Mid-body
Rhinocheilus lecontei	2017-06-18	32.1603	-106.481	N	M	27.1	4.2	7
Crotalus atrox	2017-06-29	32.1931	-106.422	N	F	67.5	4.6	164
Crotalus atrox	2017-07-20	32.1861	-106.432	Y	M	102.9	9.7	689
Lampropeltis splendida	2017-07-20	32.1329	-106.497	N	M	72.5	11	124
Rhinocheilus lecontei	2017-07-20	32.3148	-106.407	N	M	57.9	10.3	66
Crotalus atrox	2017-07-25	32.2692	-106.4	N	F	81	5.4	436
Crotalus viridis	2017-07-25	32.0531	-106.474	Y	F	62.5	3.7
Tantilla nigriceps	2017-07-25	32.3083	-106.405	N	F	19.7	4.1	3
Crotalus atrox	2017-08-10	32.163	-106.477	N	J	29.8	2.8	18
Crotalus atrox	2017-08-10	32.1645	-106.475	Y	M	84.5	7.8	330	Mid-body
Crotalus atrox	2017-08-10	32.1734	-106.457	N	F	54.5	3.4	98
Crotalus atrox	2017-08-10	32.2835	-106.4	N	J	29.1	2.8	16
Hypsiglena jani	2017-08-10	32.3121	-106.406	N	F	28.4	4.1	8
Arizona elegans	2017-08-22	32.1959	-106.418	Y	M	34.6	6.3	14	Head
Arizona elegans	2017-08-22	32.1925	-106.423	N	J	23.9	3.8	6
Crotalus atrox	2017-08-22	32.2157	-106.402	N	J	35.9	3.3	28
Crotalus atrox	2017-08-22	32.2157	-106.402	N	M	74.4	7	282
Crotalus atrox	2017-08-22	32.1882	-106.429	N	M	103.5	7.9	778
Crotalus atrox	2017-08-22	32.1482	-106.499	N
Crotalus viridis	2017-08-22	32.0967	-106.487	N	M	57.4	4.9	121
Hypsiglena jani	2017-08-22	32.2546	-106.398	N	M	32.2	6.2	13
Masticophis flagellum	2017-08-22	32.0644	-106.478	Y
Pituophis catenifer	2017-08-22	32.1571	-106.485	N	F	42.5	5.9	26
Rhinocheilus lecontei	2017-08-22	32.2134	-106.402	N	J	22.4	3.7	5
Crotalus atrox	2017-08-27	32.0782	-106.482	Y	J	39.5	4.1	27
Crotalus atrox	2017-08-27	32.1708	-106.463	N	J
Crotalus atrox	2017-08-27	32.2124	-106.402	Y	F	74.4	6.3	313
Crotalus atrox	2017-08-27	32.2596	-106.398	N	J
Crotalus atrox	2017-08-27			Y					Mid-body
Crotalus viridis	2017-08-27	32.2651	-106.399	N	M
Arizona elegans	2017-09-10	32.0935	-106.486	Y	J	23.9	3.8	6	Mid-body
Crotalus atrox	2017-09-10	32.1724	-106.459	Y	M	48.8	4.5	82	Head
Crotalus atrox	2017-09-10	32.1783	-106.445	Y	J	30.2	2.5	15	Mid-body
Crotalus atrox	2017-09-10	32.1852	-106.433	Y	J	32.4	3	18	Head
Crotalus atrox	2017-09-10	32.224	-106.4	N
Crotalus atrox	2017-09-10	32.304	-106.404	Y	F	82.5	5.1	169	Mid-body
Crotalus viridis	2017-09-10	32.099	-106.488	N	F	63.5	4	125
Crotalus viridis	2017-09-10	32.128	-106.496	N	M	62.3	5.5	131
Pituophis catenifer	2017-09-10	32.2643	-106.399	N	M	38.4	6.3	22
Rhinocheilus lecontei	2017-09-10	32.2126	-106.402	Y	M	52.4	8.6	66	Mid-body
Arizona elegans	2017-09-17	32.0729	-106.481	N	J	20.4	3.4	3
Crotalus atrox	2017-09-17	32.1519	-106.492	N	J	30.4	2.2	18
Crotalus atrox	2017-09-17	32.2069	-106.404	N	J	34.1	2.9	19
Crotalus atrox	2017-09-17	32.2316	-106.398	N	M	63.4	5.1	153
Crotalus atrox	2017-09-17	32.24	-106.396	N	F	61.2	4.4	144
Crotalus atrox	2017-09-17	32.1857	-106.433	N	J	32.4	2.2	20
Crotalus atrox	2017-09-17	32.1747	-106.454	N	M	117.5	10	1511
Crotalus viridis	2017-09-17	32.1951	-106.419	Y	M	51.9	5	73	Mid-body
Crotalus viridis	2017-09-17	32.1994	-106.413	N	M	77.6	6.8	322
Pituophis catenifer	2017-09-17	32.1323	-106.497	Y	F	39.7	7.1	23
Salvadora deserticola	2017-09-17	32.1329	-106.497	Y	M	52.3	14.1	34	Midbody + Head
Arizona elegans	2017-09-24	32.0705	-106.48	Y
Crotalus atrox	2017-09-24	32.0533	-106.474	N	J
Pituophis catenifer	2017-09-24	32.1351	-106.498	Y	F	41.3	5.5
Pituophis catenifer	2017-09-24	32.1492	-106.495	Y	F	42.2	6.4	24
Rhinocheilus lecontei	2017-10-08	32.2443	-106.396	N	J	21.6	3.2	4
Crotalus atrox	2017-10-14	32.1619	-106.479	N	M	76.4	6.1	332
Crotalus atrox	2017-10-14	32.2779	-106.401	N	M	68.8	6.7	228
Crotalus atrox	2017-10-14	32.2113	-106.403	Y	M
Crotalus atrox	2017-10-14	32.1994	-106.413	Y	F
Crotalus viridis	2017-10-14	32.2742	-106.4	Y	F
Crotalus viridis	2017-10-14	32.0982	-106.488	N
Pituophis catenifer	2017-10-14	32.1109	-106.491	N	F	47.1	6.4	31
Pituophis catenifer	2017-10-14	32.1854	-106.433	N	F	46.5	6.8	32
Crotalus atrox	2017-10-20	32.2898	-106.4	Y	F	80.7	5.6	469	Mid-body
Crotalus atrox	2017-10-20	32.2718	-106.4	N	M	81.5	7.2	529
Crotalus atrox	2017-10-20	32.0565	-106.475	Y
Pituophis catenifer	2017-10-20	32.3021	-106.403	Y	M	37.9	5.8	16
Pituophis catenifer	2017-10-20	32.1048	-106.489	Y	M	41.6	7.1	25
Crotalus atrox	2017-11-03	32.2684	-106.399	Y	M	90.7	8.6	649
Crotalus atrox	2017-11-03	32.205	-106.405	N	M	40.6	3.2	42
Hypsiglena jani	2017-11-03	32.163	-106.477	Y	F	39.2	5.9	23
